# Supplementary material for: A MnS/FeS2 heterostructure with a high degree of lattice matching anchored into carbon skeleton for ultra-stable sodium-ion storage
Source: Royal Society of Chemistry journal article supplement (doi:10.1039/d1ta06760e), 2021-01-01
Supplement: d1ta06760e1.pdf [file d1ta06760e1.pdf]

## Electronic Supplementary Information

**Table S1.** The crystal structure and lattice parameter of MnS and FeS<sub>2</sub>.

| Material         | Crystal structure | a, b, c      | $\alpha, \beta, \gamma$        |
|------------------|-------------------|--------------|--------------------------------|
| MnS              | Cubic             | a=b=c=5.42 Å | $\alpha=\beta=\gamma=90^\circ$ |
| FeS <sub>2</sub> | Cubic             | a=b=c=5.22 Å | $\alpha=\beta=\gamma=90^\circ$ |

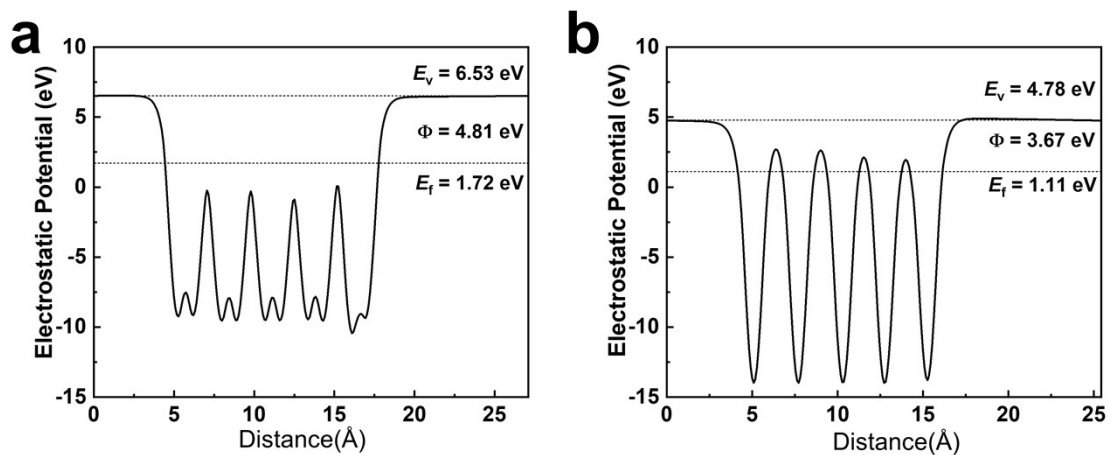

**Figure S1.** Calculated electrostatic potentials and work functions for a) FeS<sub>2</sub> (200) and b) MnS (200) surfaces.

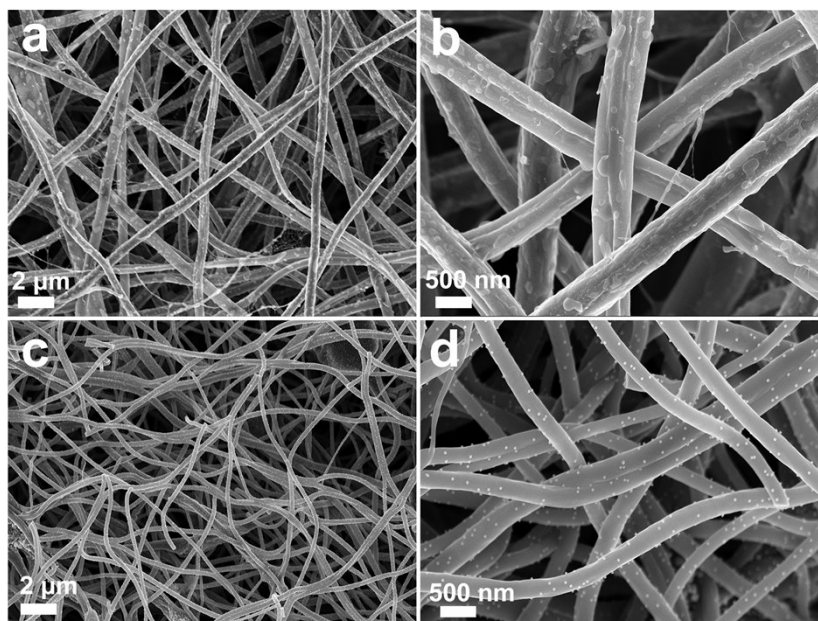

**Figure S2.** SEM images for (a, b) FeS<sub>2</sub>@CNFs and (c, d) MnS@CNFs.

**Table S2** ICP analysis of MnS/FeS<sub>2</sub>@CNFs composites.

| Sample                     | Fe (wt.%) | Mn (wt.%) | Atomic molar ratio |
|----------------------------|-----------|-----------|--------------------|
| MnS/FeS <sub>2</sub> @CNFs | 7.49      | 2.64      | 1:0.352            |

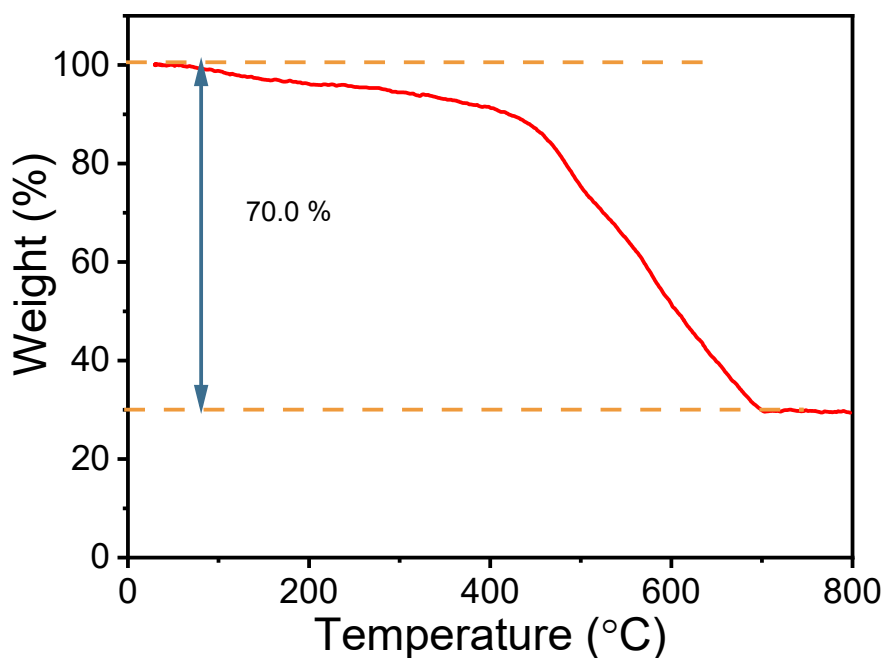

**Figure S3.** TG curve of MnS/FeS<sub>2</sub>@CNFs.

TG analysis in air shows the final mass ratio of 30.0 wt% which can correspond to the stable oxidation states: Fe<sub>2</sub>O<sub>3</sub> and MnO<sub>2</sub>. According to the results of ICP, the atomic ratio of Fe and Mn in composite was approximately 1:0.352. Thus, 30.0% product includes 18.5 wt% Fe<sub>2</sub>O<sub>3</sub> and 11.5 wt% MnO<sub>2</sub> calculated by the following equation.

$$W_{Fe_2O_3} = \frac{W_{Total}}{0.5 M_{Fe_2O_3} + 0.352 M_{MnO_2}} \times 0.5 M_{Fe_2O_3}$$

Further, 18.5 wt% Fe<sub>2</sub>O<sub>3</sub> corresponds to 27.9 wt% FeS<sub>2</sub> according to the equation:

$$W_{FeS_2} = \frac{2 \times M_{FeS_2}}{1 \times M_{Fe_2O_3}} \times W_{Fe_2O_3}$$

Similarly, 11.5 wt% MnO<sub>2</sub> coincides to 11.5 wt% MnS. Then, the content of the carbon component was computed to be 60.6 wt%.

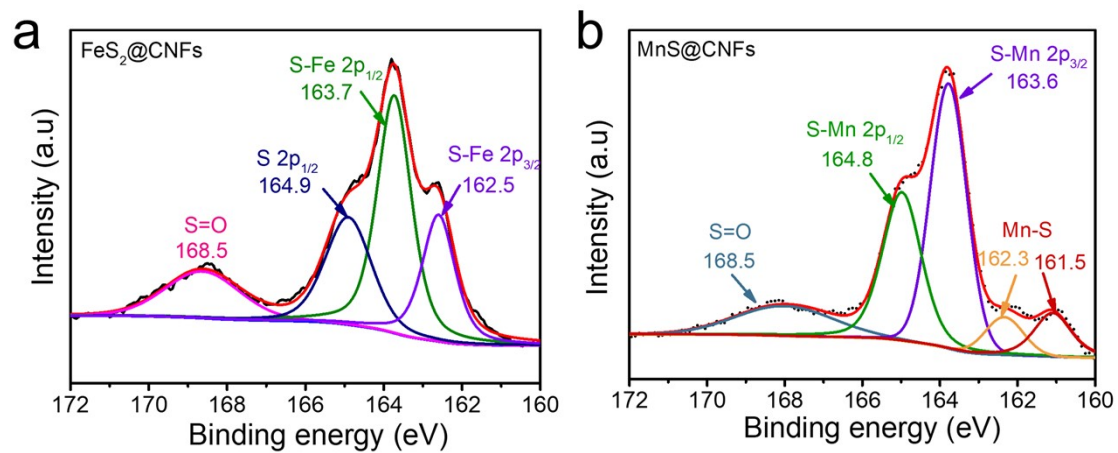

**Figure S4.** S 2p spectra of (a) FeS<sub>2</sub>@CNFs and (b) MnS@CNFs.

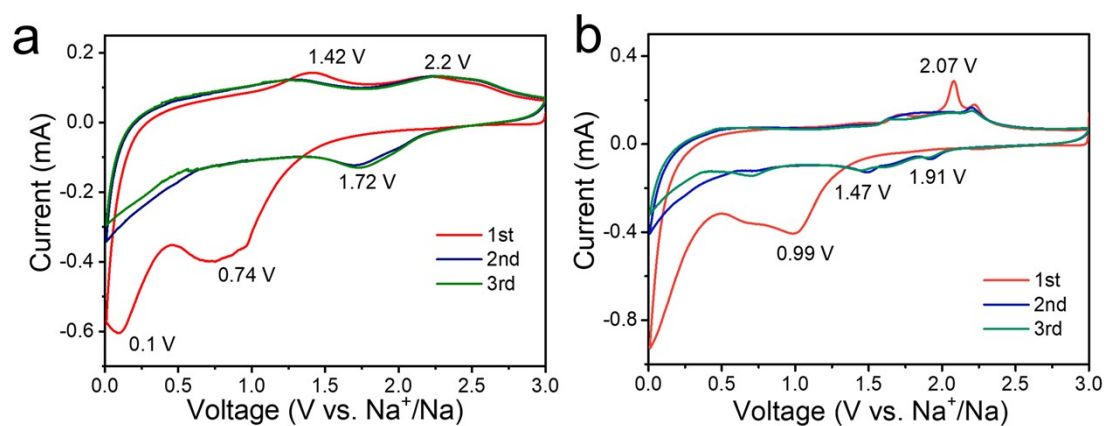

**Figure S5.** CV curves for the initial three cycles of (a) FeS<sub>2</sub>@CNFs and (b) MnS@CNFs electrode at a scan rate of 0.5 mV s<sup>-1</sup>.

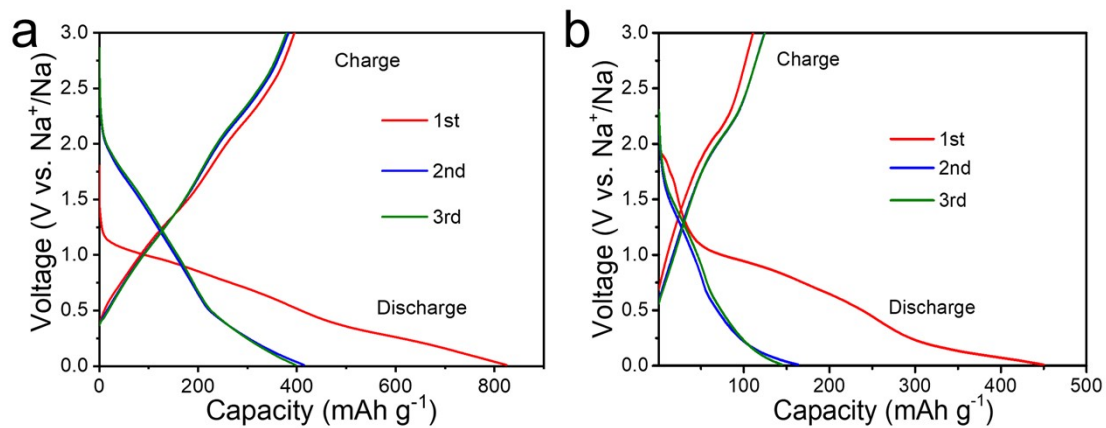

**Figure S6.** Galvanostatic discharge-charge curves for selected cycles of (a)  $\text{FeS}_2@\text{CNFs}$  and (b)  $\text{MnS}@\text{CNFs}$  electrode at  $1.0 \text{ A g}^{-1}$ .

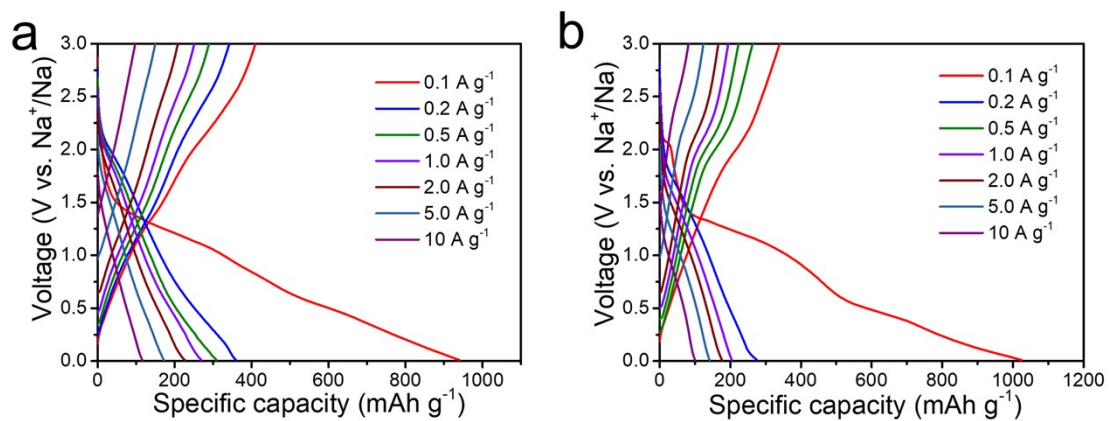

**Figure S7.** Galvanostatic discharge-charge curves at various current densities of (a)  $\text{FeS}_2@\text{CNFs}$  and (b)  $\text{MnS}@\text{CNFs}$  electrode.

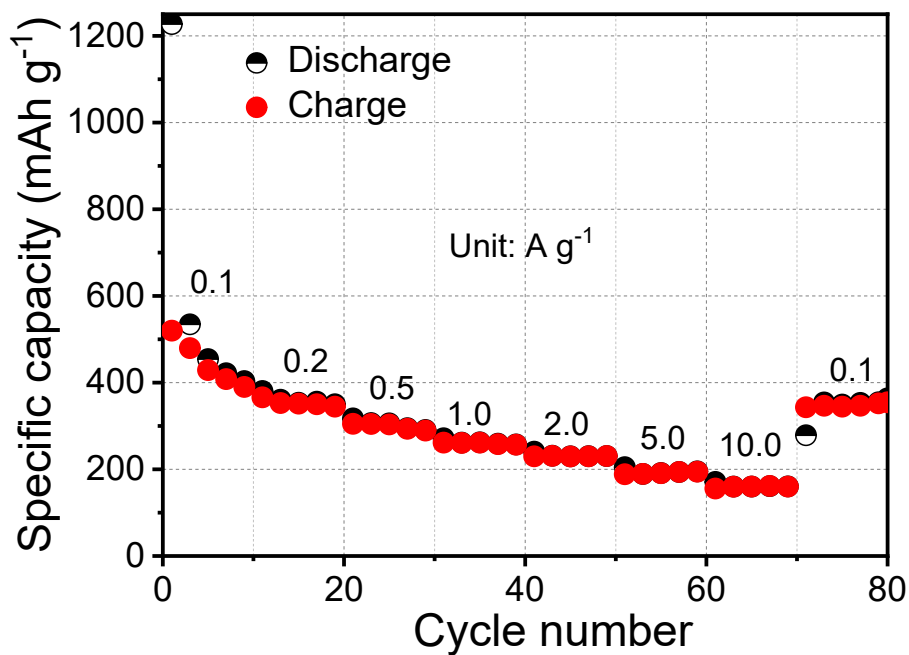

**Figure S8.** Rate performance of the physical mixture of MnS@CNFs and FeS<sub>2</sub>@CNFs

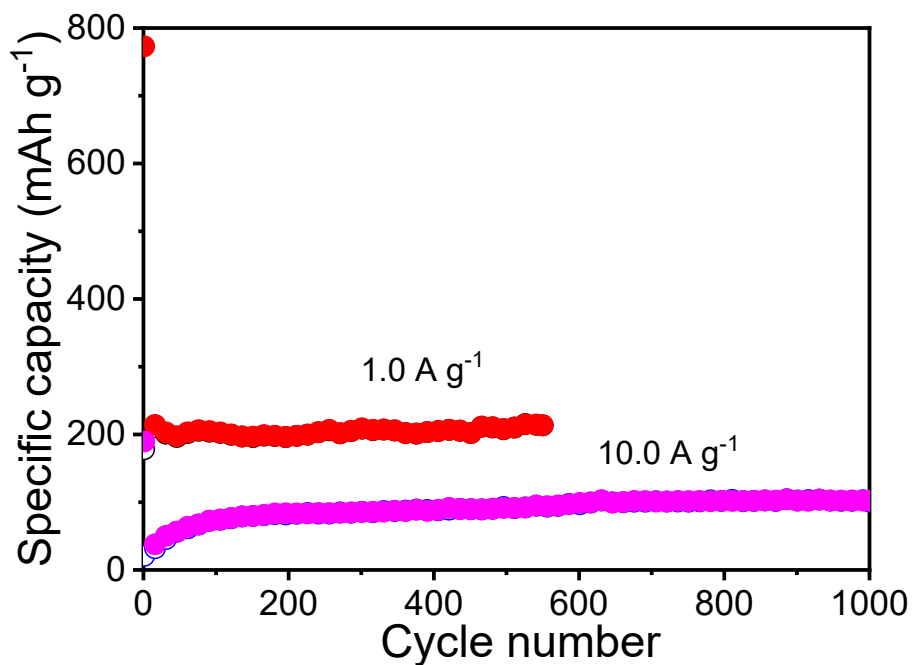

**Figure S9.** The cycling performance of pure CNFs under current density of 1.0 and 10.0 A g<sup>-1</sup>, respectively.

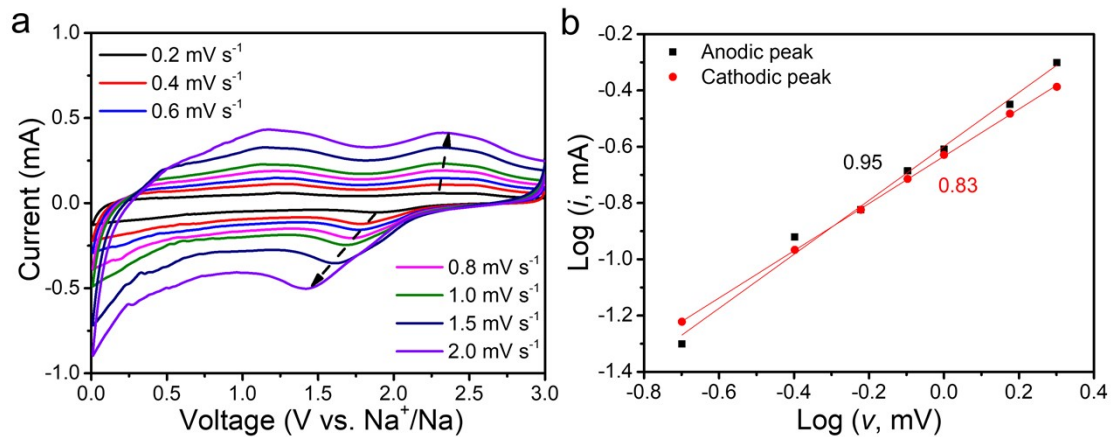

**Figure S10.** (a) CV curves at various scan rates and (b)  $b$  values at the anodic and cathodic peaks of FeS<sub>2</sub>@CNFs electrode.

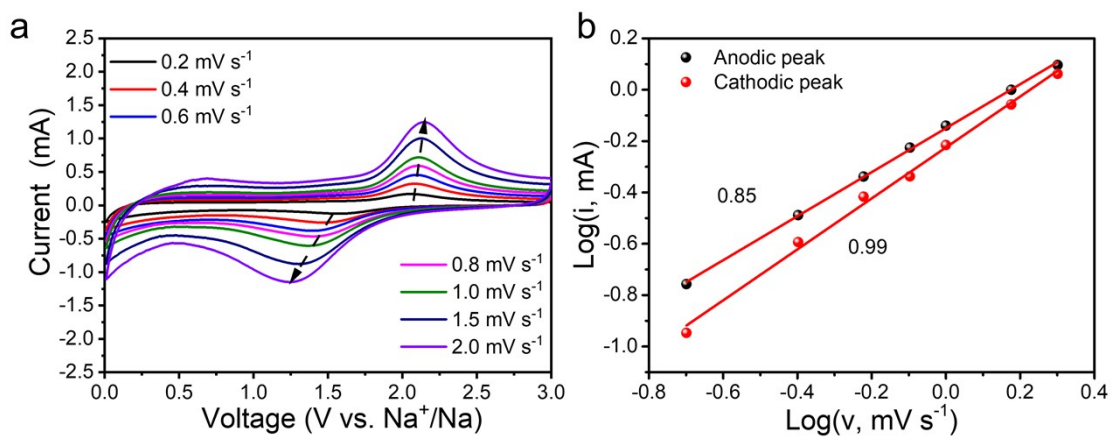

**Figure S11.** (a) CV curves at various scan rates and (b)  $b$  value at the anodic and cathodic peaks of MnS@CNFs electrode.

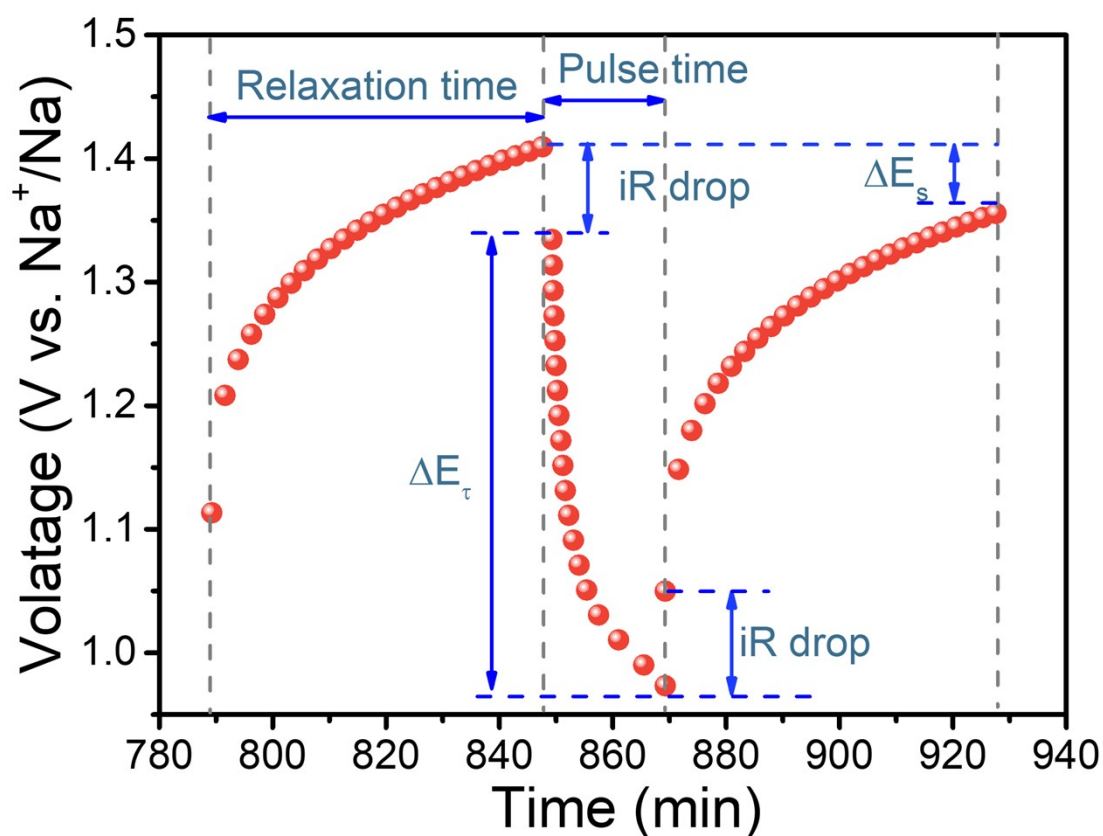

**Figure S12.** Discharge profiles of MnS/FeS<sub>2</sub>@CNFs electrode for a single GITT during discharge process.

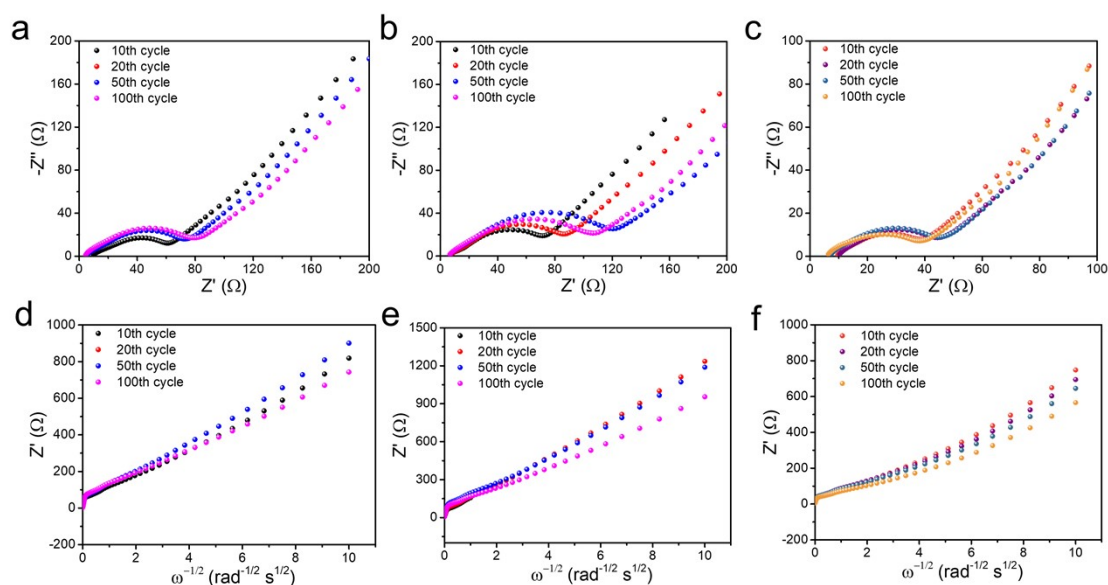

**Figure S13.** (a, b, c) EIS plots and (d, e, f) the relationship between  $Z'$  and  $w^{-1/2}$  of MnS@CNFs, FeS<sub>2</sub>@CNFs, MnS/FeS<sub>2</sub>@CNFs, respectively.



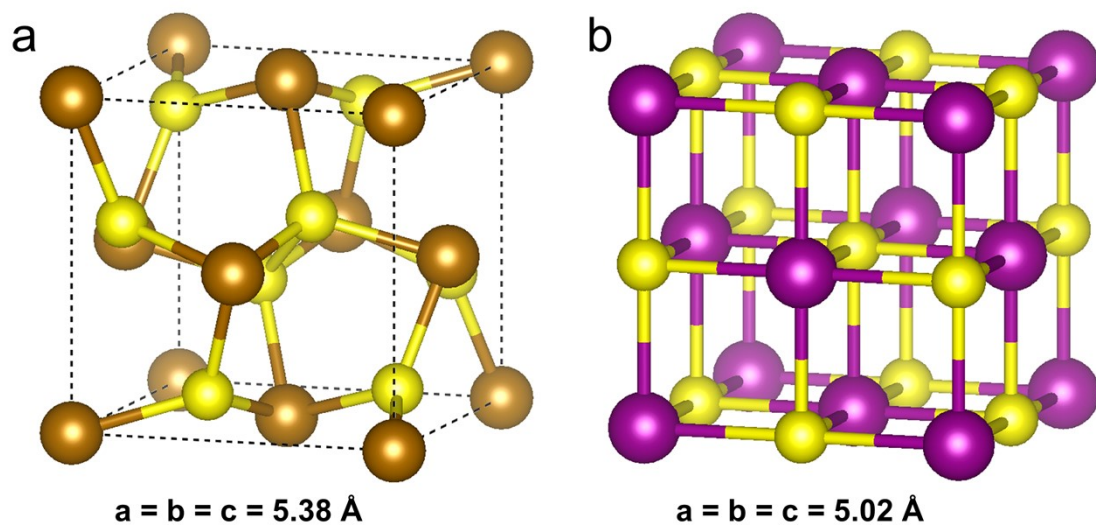

**Figure S14.** Optimized crystal structures of (a) FeS<sub>2</sub> and (b) MnS. The yellow, brown, and purple spheres denote the S, Fe, and Mn atoms, respectively.

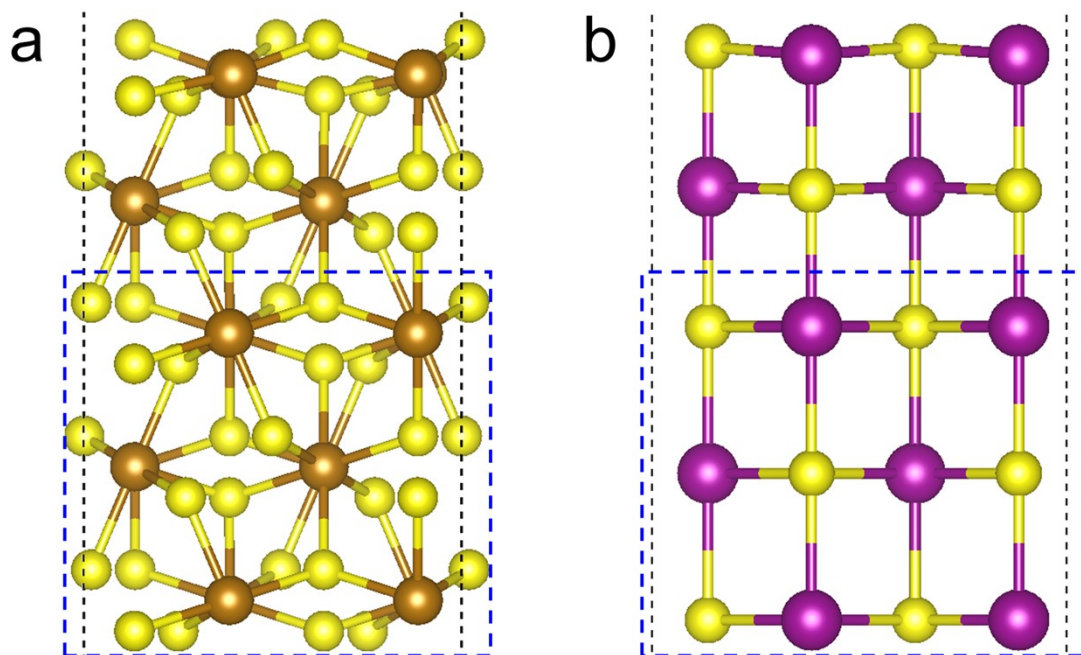

**Figure S15.** Slab models of the (200) surface for (a) FeS<sub>2</sub> and (b) MnS. The atoms in the blue box are fixed. The yellow, brown, and purple spheres denote the S, Fe, and Mn atoms, respectively.

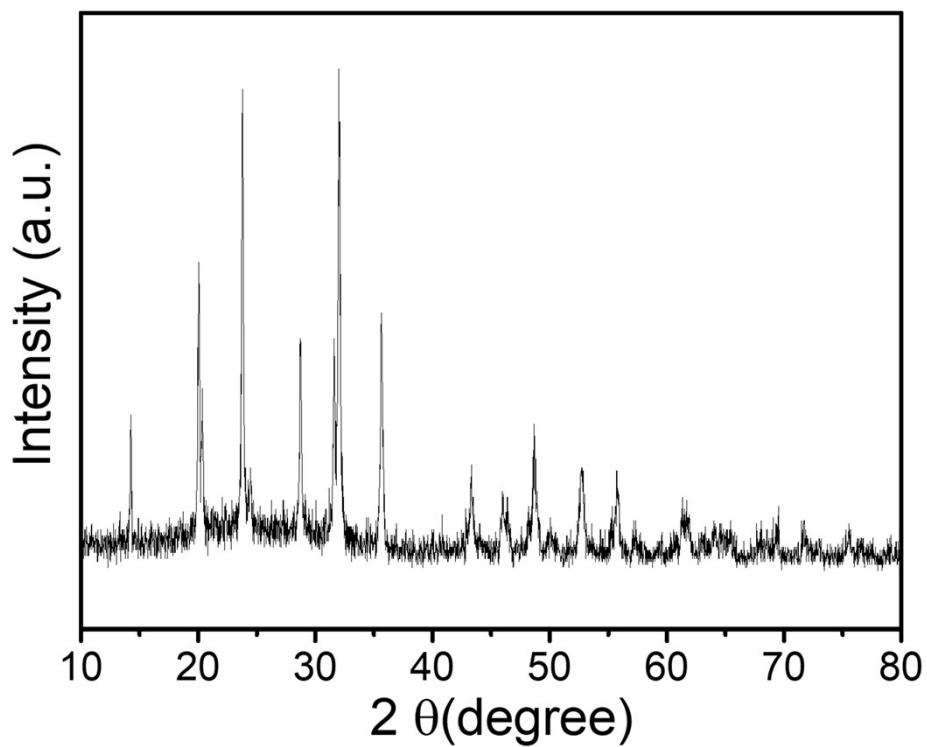

Figure S16. XRD pattern of  $\text{Na}_3\text{V}_2(\text{PO}_4)_3$ .

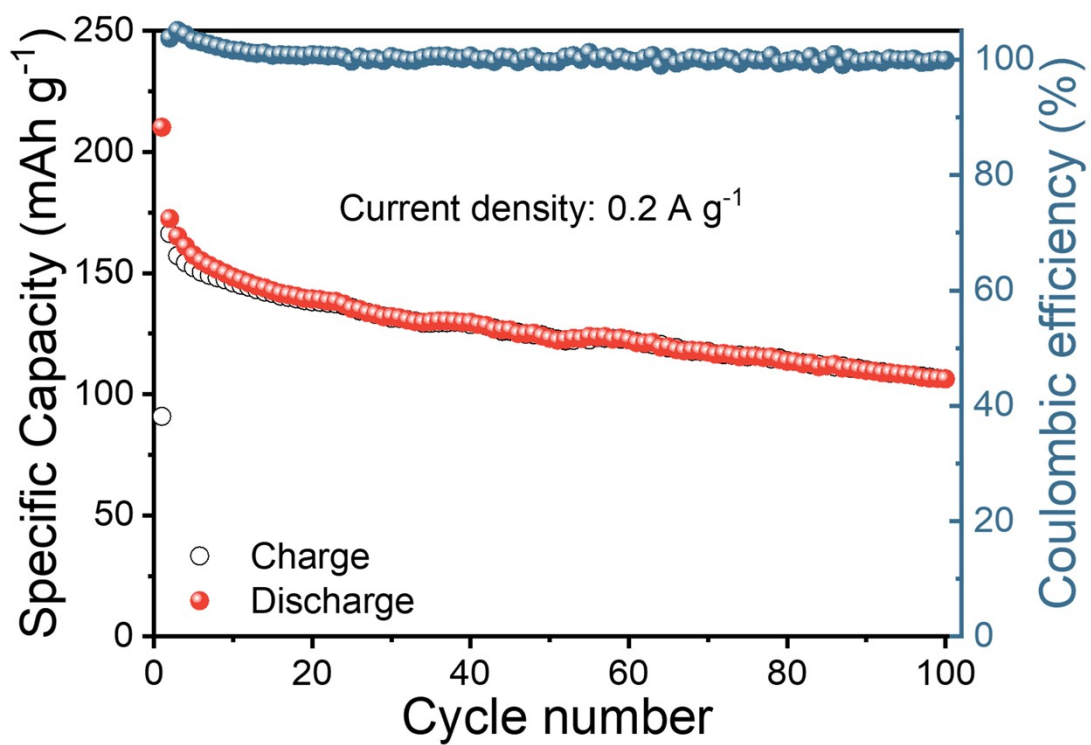

Figure S17. Cycling durability of  $\text{Na}_3\text{V}_2(\text{PO}_4)_3$  cathode.

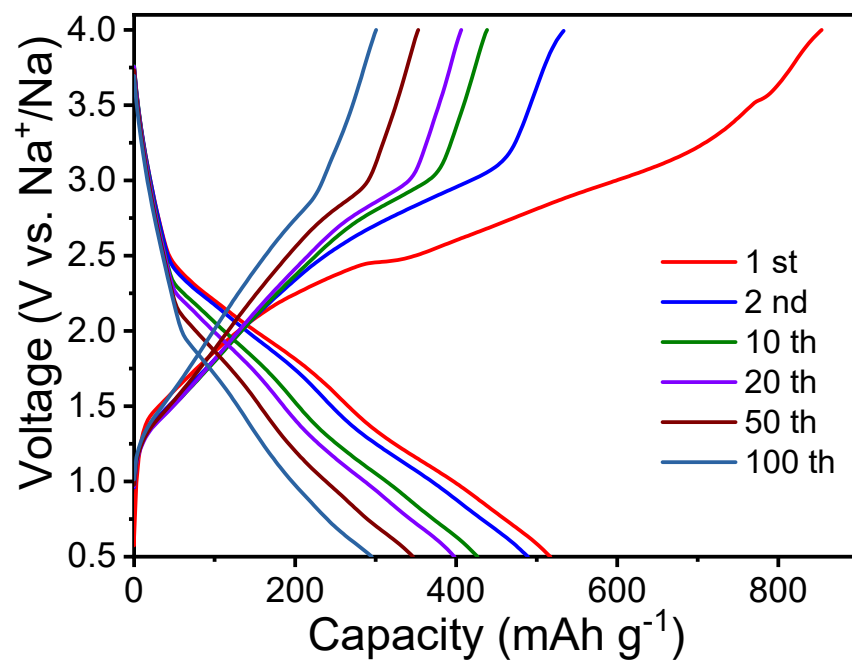

**Figure S18.** The charge and discharge curves of the full battery.
